# Supplementary material
Source: Springer Nature journal article supplement (https://www.springerprofessional.de/resource/supplementary/13673_2012_31_MOESM6_ESM.pdf/11899394)
Supplement: MOESM6 [file 11899394]

?xml version="1.0"?>

<rdf:RDF xmlns:rdf="http://www.w3.org/1999/02/22-rdf-syntax-ns#" xmlns:rs="http://www.w3.org/News/2011">

<rdf:Description rdf:about="http://www.w3.org/News/2011">

<Content-Type>text/html; charset=utf-8</Content-Type>

<viewport>width=device-width</viewport>

<rs:recource>

<rdf:Bag>

<rdf:li rdf:resource="http://www.w3.org/News/2011#entry-9116" />

<!-- Declaration of other object resources are omitted -->

</rdf:Bag>

</rs:recource>

</rdf:Description>

<rdf:Description rdf:about="http://www.w3.org/News/2011#entry-9116">

<rdf: keyword rdf:resoutce="urn:onject:CSS" />

<rs:recource>

<rdf:Bag>

<rdf:li rdf:resource="http://www.w3.org/TR/2011/REC-CSS2-20110607/" />

<rdf:li rdf:resource="http://www.w3.org/Style/CSS/Test/CSS2.1/" />

<rdf:li rdf:resource="http://www.w3.org/TR/2011/REC-css3-color-20110607/" />

<rdf:li rdf:resource="http://www.w3.org/TR/2011/REC-mathml-for-css-20110607/" />

<rdf:li rdf:resource="http://www.w3.org/2011/05/css-pr.html.en" />

<rdf:li rdf:resource="http://www.w3.org/2011/05/css-testimonials.html" />

<rdf:li rdf:resource="http://www.w3.org/Style/CSS/" />

</rdf:Bag>

</rs:recource>

</rdf:Description>

<rdf:Description rdf:about="urn:onject:CSS">

<rs:recource>

<rdf:Bag>

<rdf:li rdf:resource="http://www.w3.org/TR/2011/REC-CSS2-20110607/" />

<rdf:li rdf:resource="http://www.w3.org/Style/CSS/Test/CSS2.1/" />

<rdf:li rdf:resource="http://www.w3.org/TR/2011/REC-css3-color-20110607/" />

<rdf:li rdf:resource="http://www.w3.org/TR/2011/REC-mathml-for-css-20110607/" />

<rdf:li rdf:resource="http://www.w3.org/2011/05/css-pr.html.en" />

<rdf:li rdf:resource="http://www.w3.org/2011/05/css-testimonials.html" />

<rdf:li rdf:resource="http://www.w3.org/Style/CSS/" />

</rdf:Bag>

</rs:recource>

</rdf:Description>

<!-- Declaration of other content resources are omitted -->

</rdf:RDF>
